# Supplementary material for: The Changes in Cyanobacterial Concentration of β-Methylamino-L-Alanine during a Bloom Event
Source: MDPI journal article supplement (doi:10.3390/molecules27217382), 2022-10-30
Supplement: s1 [file s1]

## Supplementary Information

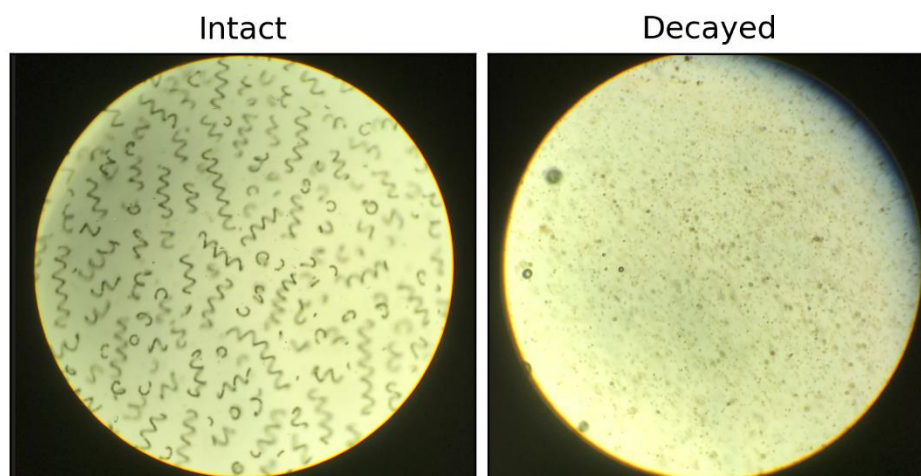

**Supplementary Figure S1.** Micrograph of the two samples taken from 07/02/2020 at 100x magnification. “Intact” is the sample taken from the bulk of the bloom, “Decayed” was selectively sampled from a part of the bloom with cell breakdown.

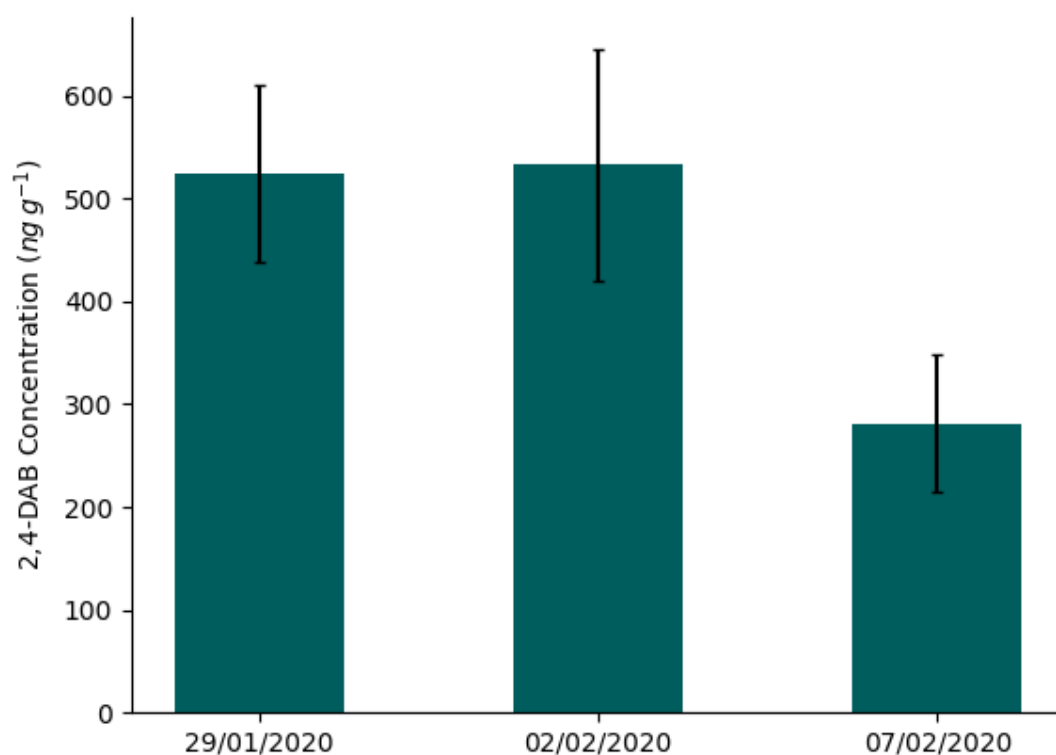

**Supplementary Figure S2** 2,4-DAB concentrations in the insoluble fraction  $\pm$  standard deviation in environmental cyanobacteria samples ( $n=3$ ,  $n=6$  for 07/02/2020 with combined decayed and the intact results).

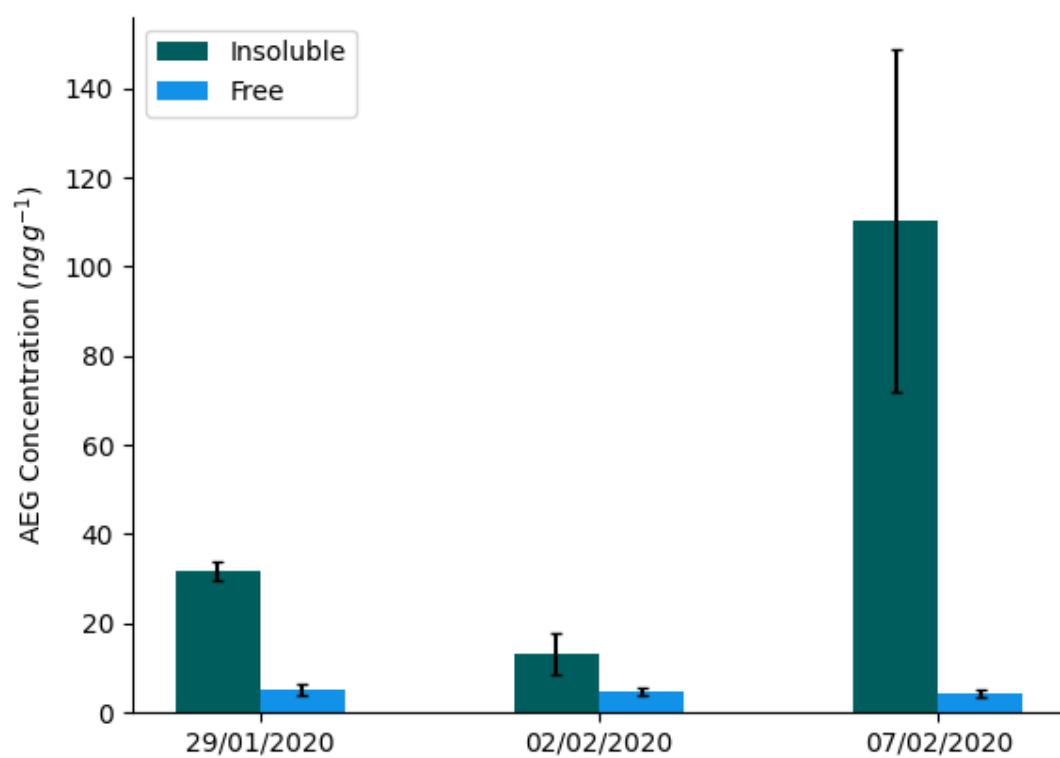

**Supplementary Figure S3** AEG concentrations  $\pm$  standard deviation in environmental cyanobacteria samples (n=3, n=6 for 07/02/2020 with combined decayed and the intact results).
